# Supplementary material for: Ion mobility spectrometry combined with multivariate statistical analysis: revealing the effects of a drug candidate for Alzheimer’s disease on Aβ1-40 peptide early assembly
Source: PubMed Central journal article supplement (PMC6718366; doi:10.1007/s00216-019-02030-7), 2019-08-12
Supplement: 216_2019_2030_MOESM1_ESM.pdf [file 216_2019_2030_MOESM1_ESM.pdf]

**Analytical and Bioanalytical Chemistry**

**Electronic Supplementary Material**

**Ion mobility spectrometry combined with multivariate statistical analysis:  
revealing the effects of a drug candidate for Alzheimer's disease on A $\beta$ 1-40  
peptide early assembly**

Serena Lazzaro, Nina Ogrinc, Lieke Lamont, Graziella Vecchio, Giuseppe Pappalardo,  
Ron M.A. Heeren

## Assignment of the ESI-IM-MS spectra to specific early-stage species of A $\beta$ 40

A $\beta$  native monomer in a freshly prepared solution exists in rapid equilibrium with lowly populated and short-lived low molecular weight oligomers (LMWs) further evolving into higher order aggregates. Using gentle ESI conditions, small aggregates of A $\beta$  in water can be transferred to the gas phase, making it possible to “freeze” by IM-MS the size and conformational distribution of the transient and not-covalently-stabilized LMWs. Drift time (dt) measurement allows the IMS of the species with the same mass -such as compact and extended conformations of D<sup>5+</sup>- or with the same  $m/z$  value -such as for the protonated monomer (M<sup>2+</sup>), dimer (D<sup>4+</sup>) and trimer (TRI<sup>6+</sup>). These could not be identified in the classic MS spectrum due to their overlapping isotopic envelope (Fig. 2,b). By contrast, these can be seen as separate species due to their different mobility (dt), as they drift through a neutral gas under the influence of a weak electric field. LMWs with compact conformations undergo fewer collisions with neutral gas than those with extended conformations, and thus will have higher mobilities (<dt). Similarly, LMWs with higher charge states will also have higher mobilities. As result, the size and conformational distribution of species can be fixed on a two-dimensional map (Fig. 2,a), with signals separated both in the domain of  $m/z$  and in the dt, as previously described<sup>35</sup>. In our work, peak assignments were performed using their <sup>13</sup>C isotope distributions of the protonated species separated in the IM dimension with the MS operating in resolution mode. Based on their resolved isotopic distribution (Fig. S1), the signal with a monoisotopic (mon)  $m/z$  at 1082.79, consistent with a charge +4, was assigned to M<sup>4+</sup>; the signal at 1443.39 (mon), consistent with charge +3, to M<sup>3+</sup>; the three signals with the same (mon)  $m/z$  at 2164.58, consistent with charge +2, +4 and +6, were assigned to the M<sup>2+</sup>, D<sup>4+</sup> and TRI<sup>6+</sup>, respectively; the signal at average  $m/z$  2598.92, consistent with a charge state +5, was identified as TRI<sup>5+</sup>; the signal at average  $m/z$  2887.58 as D<sup>3+</sup>. The conformation of the ions was also taken into account for the assignment of the two species with same (mon)  $m/z$  at 1731.87 and <sup>13</sup>C isotope distribution. These species, having different mobilities (dt), were attributed to the compact and

extended forms of the  $D^{5+}$ . The  $D^{5+}$  with compact conformation undergoes fewer collisions with neutral gas as it drifts under the influence of the electric field than that one with extended conformation. As result, compact  $D^{5+}$  will have higher mobility (<dt) as shown on Fig. 2,a and Fig. S2,d.

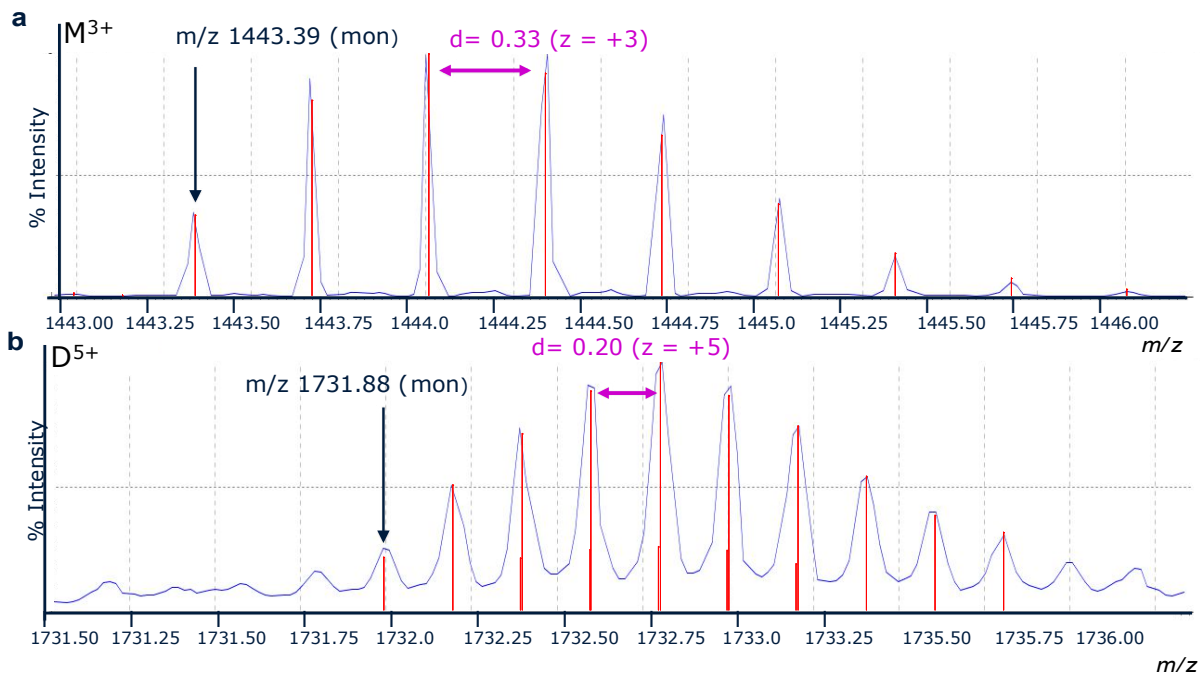

**Fig. S1** Representative  $^{13}\text{C}$  isotope distributions of the  $\text{A}\beta 40$  protonated species separated in the IM dimension. These were used to assign the charge state to each species detected in “ $\text{A}\beta 40$ ” sample-sets. Isotopic envelopes were extracted from the 2D Driftscope IM-MS plot (shown on Fig. 2,a). Each signal is labelled with the associated experimental monoisotopic (mon)  $m/z$ , highlighted by arrows, and the measured Da spacing ( $d$ , in purple) of the isotopic envelope, indicating the corresponding charge state ( $z$ ). The signal with (mon)  $m/z$  at 1443.39 (panel a) was therefore assigned to the quadruply-protonated monomer of  $\text{A}\beta 40$  ( $\text{M}^{4+}$ ), while the two signals with (mon)  $m/z$  at 1731.87, having the same envelop (panel b) but different drift times (at 7.28 and 10.80 ms, as shown on Fig. 2,a and Fig.S2,d) were assigned to the quintuply-protonated  $\text{A}\beta 40$  dimer ( $\text{D}^{5+}$ ), as compact and extended conformations, respectively

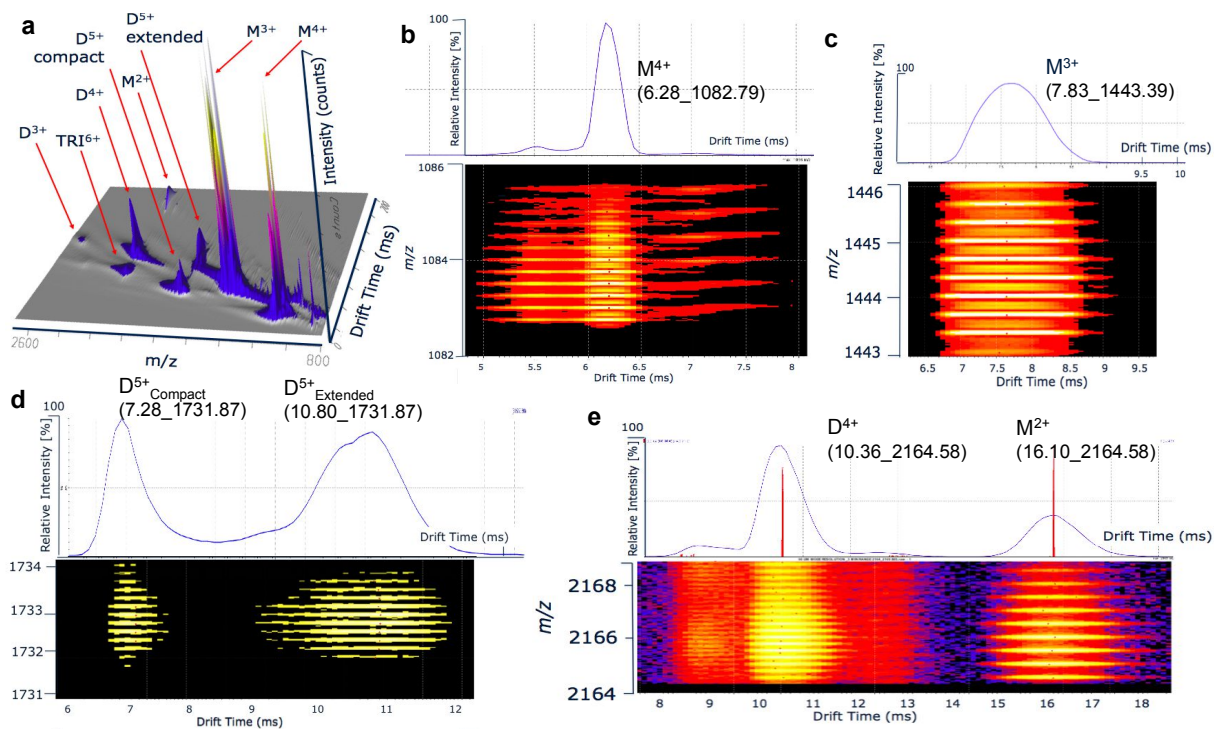

**Fig. S2** Enlarged regions selected on the 2D Driftscope IM-MS plot (shown on Fig. 2,a) covering the signal of the quadruply ( $M^{4+}$ , inset b) and triply-protonated ( $M^{3+}$ , inset c) monomer of A $\beta$ 40, the quintuply-protonated dimer, as compact and extended conformations ( $D^{5+}$ , inset d) –these overlapping in the ESI-MS spectrum (Fig. 2,b)-, and the quadruply-protonated dimer and doubly-protonated monomer ( $D^{4+}$  and  $M^{2+}$ , inset e) overlapping as well in the ESI-MS spectrum. The colored spots indicate MS peaks with amplitude increasing from purple to yellow. All signals can be well resolved in the 3D Driftscope IM-MS plot (inset a) into mobility peaks with different dt and arrival time distribution areas (ATDs). For each of the detected ATD peak, their associated dt (taken from the vertical line at the apexes of the ATD area, shown as an example on inset e) and their monoisotopic  $m/z$  (highlighted by arrows on Fig. S3) is shown as dt\_  $m/z$  pair label at the top of each peak in the extracted ion mobilogram

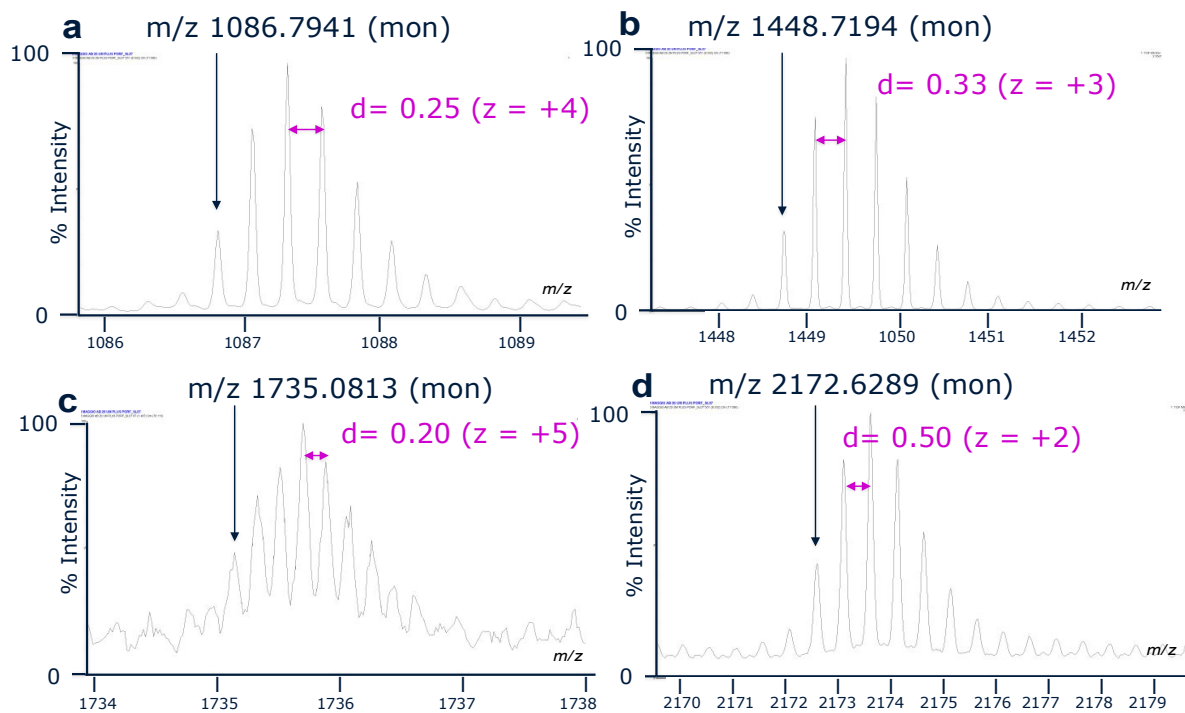

**Fig. S3** Isotopic envelopes of the protonated species detected in “A $\beta$ 40 plus Porph” sample-sets (A $\beta$ 40:Zn-Porph, 1:1). Each signal is labelled with the associated experimental monoisotopic (mon)  $m/z$ , highlighted by arrows, and the Da spacing ( $d$ , in purple) of the isotopic envelope, indicating the corresponding charge state ( $z$ )

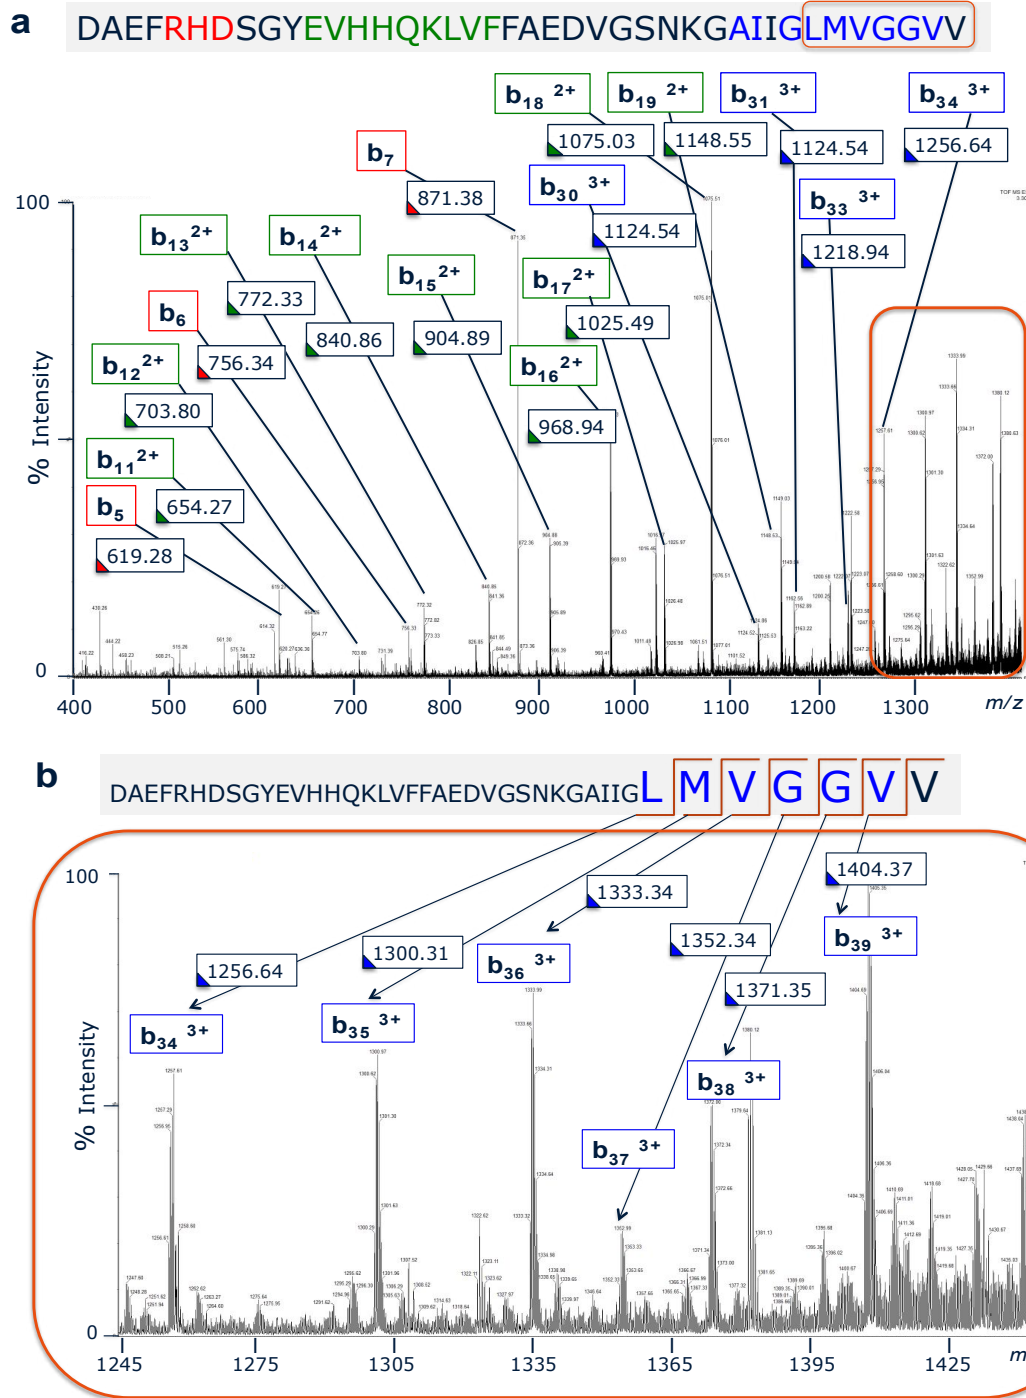

**Fig. S4** At the top, MS/MS fragmentation spectrum (CE 70) of triply-protonated monomer of A $\beta$ 40 ( $M^{3+}$ ) with (mon)  $m/z$  at 1443.39 detected in “A $\beta$ 40” sample-sets. Data were acquired within the  $m/z$  range 200-1440 applying in the TRAP cell a collision energy (CE) value of 70 eV with the quadrupole analyzer used to select ions through a narrow window (LM resolution window: 6.5). The inset in panel a is the full-length A $\beta$  1-40 amino acid sequence. The *b*-type ions are labelled with corresponding monoisotopic  $m/z$ . Singly charged product *b*-type ions are marked with red boxes, while the predominant doubly and triply charged *b*-type ions in

green and blue, respectively. b) At the bottom, the zoom into the MS/MS spectrum (shown in a) in the  $m/z$  range 1245-1440 covering the residues 34-39. Predominant triply charged *b-type* ions are labelled with blue boxes and corresponding monoisotopic  $m/z$

| Fragment      | Expected<br>(mon) $m/z$ | Experimental<br>(mon) $m/z$ | $\Delta$ (ppm) |
|---------------|-------------------------|-----------------------------|----------------|
| $b_5^{1+}$    | 619.2835                | 619.2847                    | 1.9377         |
| $b_{11}^{2+}$ | 654.2680                | 654.2657                    | 3.5153         |
| $b_{12}^{2+}$ | 703.8022                | 703.8019                    | 0.4262         |
| $b_6^{1+}$    | 756.3424                | 756.3454                    | 3.9664         |
| $b_{13}^{2+}$ | 772.3317                | 772.3304                    | 1.6832         |
| $b_{14}^{2+}$ | 840.8611                | 840.8630                    | 2.2595         |
| $b_7^{1+}$    | 871.3693                | 871.3778                    | 9.7547         |
| $b_{15}^{2+}$ | 904.8904                | 904.8896                    | 0.8840         |
| $b_{16}^{2+}$ | 968.9379                | 968.9412                    | 3.4057         |
| $b_{17}^{2+}$ | 1025.4799               | 1025.4896                   | 9.4589         |
| $b_{18}^{2+}$ | 1075.0141               | 1075.0258                   | 10.8835        |
| $b_{30}^{3+}$ | 1124.5325               | 1124.5444                   | 10.5821        |
| $b_{19}^{2+}$ | 1148.5483               | 1148.5532                   | 4.2662         |
| $b_{31}^{3+}$ | 1162.2271               | 1162.2291                   | 1.72083        |
| $b_{32}^{3+}$ | 1199.9218               | 1199.9303                   | 7.0837         |
| $b_{33}^{3+}$ | 1218.9290               | 1218.9454                   | 13.4544        |
| $b_{20}^{2+}$ | 1222.0825               | 1222.0861                   | 2.9457         |
| $b_{34}^{3+}$ | 1256.6237               | 1256.6354                   | 9.3106         |
| $b_{35}^{3+}$ | 1300.3038               | 1300.3066                   | 2.1533         |
| $b_{22}^{2+}$ | 1322.1224               | 1322.1283                   | 4.4625         |
| $b_{36}^{3+}$ | 1333.3266               | 1333.3383                   | 8.7750         |
| $b_{37}^{3+}$ | 1352.3338               | 1352.3353                   | 1.1091         |
| $b_{38}^{3+}$ | 1371.3410               | 1371.3538                   | 9.3339         |
| $b_{23}^{2+}$ | 1379.6359               | 1379.6400                   | 2.9717         |
| $b_{39}^{3+}$ | 1404.3638               | 1404.3707                   | 4.9132         |
| $M^{3+}$      | 1443.3901               | 1443.4110                   | 14.4798        |

**Table S1** Expected and experimental monoisotopic (mon)  $m/z$  value of *b*-type ions covering the residues 35-39 detected in the ESI MS/MS spectrum (Fig. S4). In column four the deviation is given (in parts per million) for the expected versus the experimental values



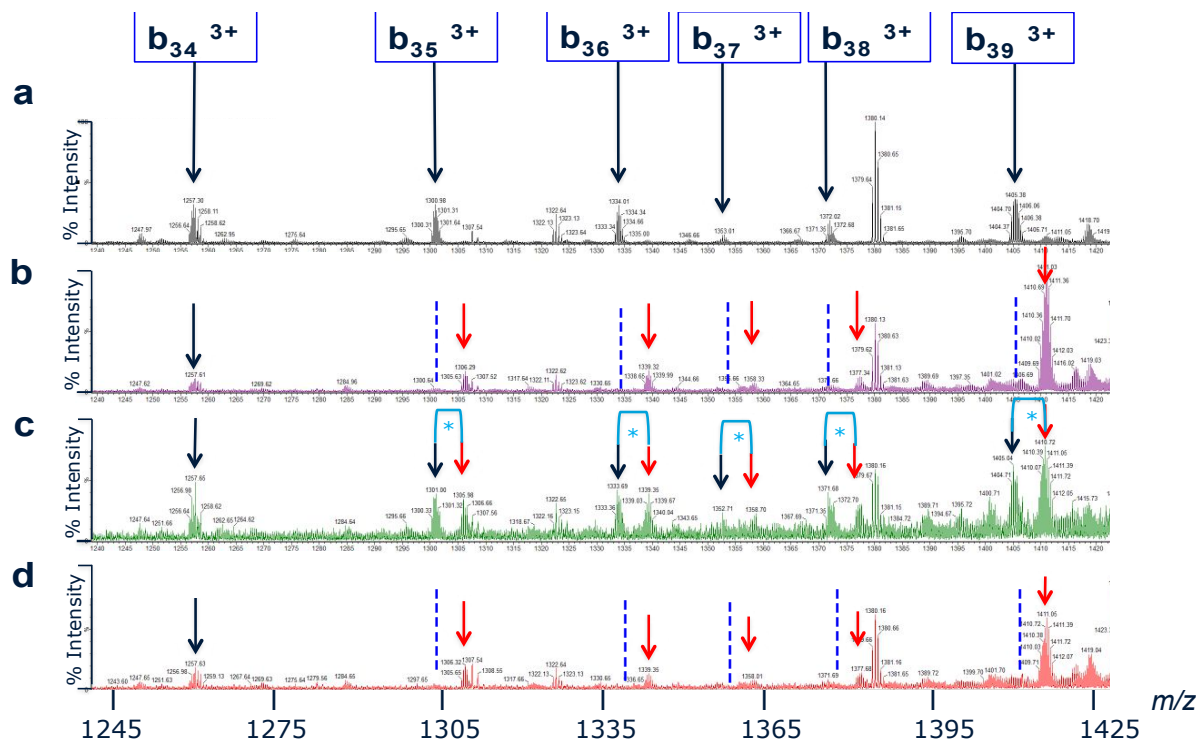

**Fig. S5** Zoom of the 1245-1425  $m/z$  range covering the C-terminal part of the A $\beta$ 40 sequence. Comparison of the MS/MS patterns of  $M^{3+}$  of A $\beta$ 40, with  $m/z$  (mon) at 1443.39, detected in the “A $\beta$ 40” sample-sets, to those of the species with  $m/z$  (mon) at 1448.72 (+3), 1735.08 (+5) and at 2172.63 (+2), detected in the “A $\beta$ 40 plus Porph” sample-sets. On the panel (a), highlighted with black arrows are the  $b_{34}^{+3}$ ,  $b_{35}^{+3}$ ,  $b_{36}^{+3}$ ,  $b_{37}^{+3}$ ,  $b_{38}^{+3}$  and  $b_{39}^{+3}$  detected for  $M^{3+}$  of A $\beta$ 40. Corresponding  $m/z$  values are shown on Fig. S 4,b. Starting from the residue at the position 35, the signals (marked with red arrows) were shifted by 16.00 mass units ( $\Delta m$ ) on the MS/MS spectra of the species with  $m/z$  (mon) at 1448.72 (+3) (panel b) and at 2172.63 (+2) (panel d). The missing signals, previously detected on the panel (a) are marked with blue dotted lines. This proves that the signals at  $m/z$  1448.72 and at 2173.63 detected in the “A $\beta$ 40 plus Porph” sample-sets correspond to the monomer triply  $-[A\beta 40 \text{ Met-35(O)}+3H^+]^{3+}$ - and doubly  $[A\beta 40 \text{ Met-35(O)}+2H^+]^{2+}$  charged ions, respectively. The co-detection of  $b$ -fragments of oxidized (marked with red arrows) and not oxidized (marked with black arrows) A $\beta$ 40 at the position 35-39 (panel c) is indicative that the species with  $m/z$  at 1735.08 is the dimer (+5)  $-[(A\beta 40)(A\beta 40 \text{ Met-35(O)})+5H^+]^{5+}$ - consisting of one unit of A $\beta$ 40 Met-35(O) and another of unmodified A $\beta$ 40

| New detected species                                                          | Expected (mon) $m/z$ | Experimental (mon) $m/z$ | $\Delta$ (ppm) |
|-------------------------------------------------------------------------------|----------------------|--------------------------|----------------|
| $[\text{A}\beta\ 40\ \text{Met-35(O)}+4\text{H}^+]^{4+}$                      | 1086.7944            | 1086.7941                | 0.2760         |
| $[\text{A}\beta\ 40\ \text{Met-35(O)}+3\text{H}^+]^{3+}$                      | 1448.7235            | 1448.7194                | 2.8300         |
| $[(\text{A}\beta\ 40)(\text{A}\beta\ 40\ \text{Met-35(O)})+5\text{H}^+]^{5+}$ | 1735.0656            | 1735.0813                | 9.04865        |
| $[\text{A}\beta\ 40\ \text{Met-35(O)}+2\text{H}^+]^{2+}$                      | 2172.5815            | 2172.6289                | 21.8174        |

**Table S2** Expected monoisotopic (mon)  $m/z$ , experimental monoisotopic  $m/z$  and the resulting mass error (ppm) calculated for the species with  $m/z$  (mon) at 1086.79(+4), 1448.72 (+3), 1735.08 (+5) and at 2172.63 (+2) detected in the three “A $\beta$ 40 plus Porph” sample-sets (Fig. 3)

| Fragment                  | Expected (mon) $m/z$ | MS/MS 1448.7 Experimental (mon) $m/z$ [A $\beta$ 40 Met-35(O) +3H $^+$ ] $^{3+}$ | $\Delta$ (ppm) | MS/MS 1735.1 Experimental (mon) $m/z$ [(A $\beta$ 40)(A $\beta$ 40 Met-35(O)) +5H $^+$ ] $^{5+}$ | $\Delta$ (ppm) | MS/MS 2173.6 Experimental (mon) $m/z$ [A $\beta$ 40 Met-35(O) +2H $^+$ ] $^{2+}$ | $\Delta$ (ppm) |
|---------------------------|----------------------|----------------------------------------------------------------------------------|----------------|--------------------------------------------------------------------------------------------------|----------------|----------------------------------------------------------------------------------|----------------|
| $b_{34}^{3+}$             | 1256.6237            | 1256.6210                                                                        | 2.1486         | 1256.6399                                                                                        | 12.8917        | 1256.6364                                                                        | 10.1064        |
| $b_{35}^{3+}$             | 1300.3039            | absent                                                                           | N/A            | 1300.3252                                                                                        | 16.3808        | absent                                                                           | N/A            |
| $b_{35}^{3+}$<br>Met35(0) | 1305.6372            | 1305.6307                                                                        | 4.9784         | 1305.6649                                                                                        | 21.2157        | 1305.6466                                                                        | 7.1995         |
| $b_{36}^{3+}$             | 1333.3267            | absent                                                                           | N/A            | 1333.3560                                                                                        | 21.9751        | absent                                                                           | N/A            |
| $b_{36}^{3+}$<br>Met35(0) | 1338.6600            | 1338.6492                                                                        | 8.0678         | 1338.6672                                                                                        | 5.3785         | 1338.6812                                                                        | 15.8367        |
| $b_{37}^{3+}$             | 1352.3338            | absent                                                                           | N/A            | Low S/N                                                                                          | N/A            | absent                                                                           | N/A            |
| $b_{37}^{3+}$<br>Met35(0) | 1357.6672            | 1357.6515                                                                        | 11.5640        | 1357.6854                                                                                        | 13.4054        | 1357.6837                                                                        | 12.1532        |
| $b_{38}^{3+}$             | 1371.3410            | absent                                                                           | N/A            | 1371.3541                                                                                        | 9.5527         | absent                                                                           | N/A            |
| $b_{38}^{3+}$<br>Met35(0) | 1376.6743            | 1376.6581                                                                        | 11.7675        | 1376.6758                                                                                        | 1.0896         | 1376.6906                                                                        | 11.8401        |
| $b_{39}^{3+}$             | 1404.3638            | absent                                                                           | N/A            | 1404.3864                                                                                        | 16.0927        | absent                                                                           | N/A            |
| $b_{39}^{3+}$<br>Met35(0) | 1409.6971            | 1409.6887                                                                        | 5.9587         | 1409.7224                                                                                        | 17.9471        | 1409.7051                                                                        | 5.6750         |

**Table S3** Mass error (ppm) calculated for monoisotopic (mon) *b-type* ions covering residues 35–39 in the MS/MS spectra of the species at  $m/z$  1448.72 (+3), 1735.08 (+5) and at 2172.63 (+2) detected in the “A $\beta$ 40 plus Porph” sample-sets

## **Automatic alignment procedure**

All IM-MS run belonging to the “A $\beta$ 40” sample-class and to the “A $\beta$ 40 plus Porph” class were imported to Progenesis QI software as ion-intensity maps including m/z and drift times. One acquisition of the “A $\beta$ 40” sample-class was manually selected as a reference run and by using the automatic alignment tool frames detected in all runs were automatically aligned. To ensure consistent peak picking and matching across all data files, an aggregate 2D IM-MS single map is created from the aligned runs. This map contains all peak information from all sample files. This map is then applied to each samples, and the alignment scores is shown for each of them. The map is then used for the peak picking in the two sample-classes, so that the same ions detected in the reference sample are detected in all runs. The peak-picking algorithm can discern overlapping peptide ions and retains information about the ATDs peak shape in each run. The automatic alignment procedure was assisted by a “review alignment” step enabling the visualization of a multi-panel window including a montage of 3D ion-intensity map (including m/z and drift times), 2D ion-mobilogram (intensity vs drift time) and the MS of each selected area on the map before and after the alignment. This panel helps to validate the ions' alignment and, during the method optimization step, to set up the “good enough” alignment quality score compensating for small variation between runs in the IM drift times. This ensures that potential conflicting features with drift times close to those “fixed” as references may not still yield positive results. As such the automatic alignment procedure does not introduce artefacts in the analysis process.

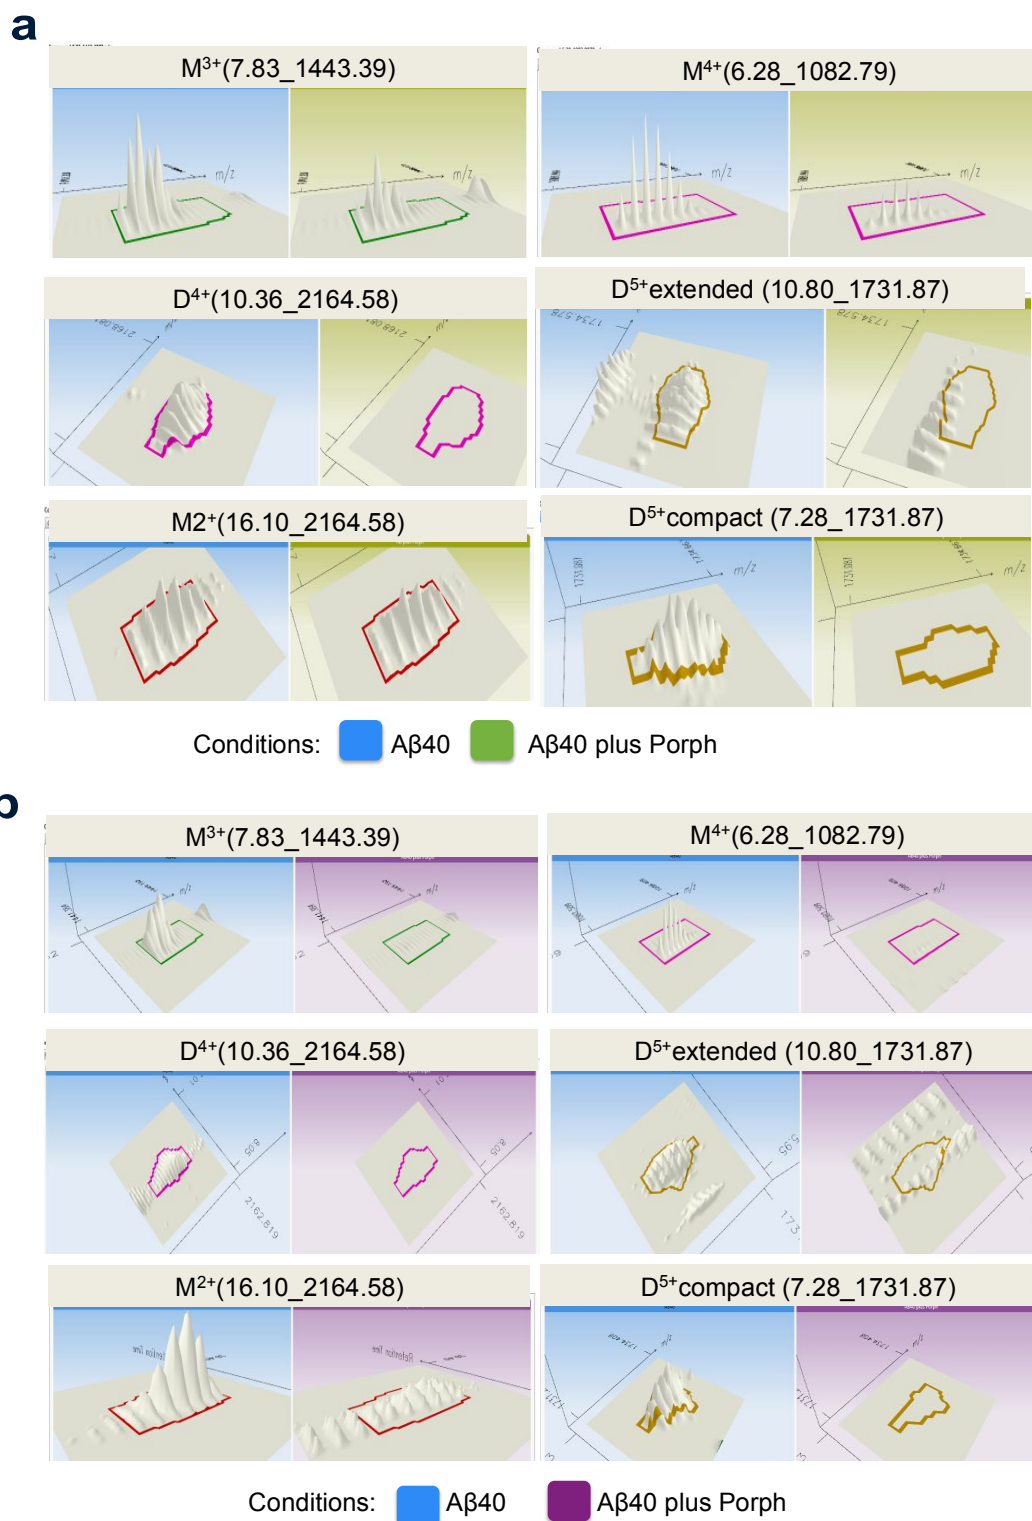

**Fig. S6** 3D montage  $m/z$  vs. drift time vs. intensity measured for a run of the “Aβ40” sample-class and a run of the “Aβ40 plus Porph” sample-class containing Zn-Porph (Aβ40:Zn-Porph, 1:1) at 5  $\mu\text{M}$  (a), at 20  $\mu\text{M}$  (b). On the 3D montage is shown the automated peak picking of the protonated monomers and dimers of Aβ40 assigned to the  $\text{M}^{3+}$ ,  $\text{M}^{4+}$ ,  $\text{D}^{4+}$ ,  $\text{M}^{2+}$  and to the compact and extended conformations of  $\text{D}^{5+}$  based on the measured isotopic envelope and drift time (dt)

measurements. To ensure consistent peak picking of the A $\beta$ 40 species and matching across all data files, for the peak-picking algorithm only the runs of “A $\beta$ 40” sample class were we ticked. However, any run of the “A $\beta$ 40 plus Porph” class, which was left un-ticked, was available in the experiment design setup. The end results were an highly reproducible peptide ion-detection and ion-abundance measurement across the “A $\beta$ 40” and A $\beta$ 40 plus Porph” sample classes

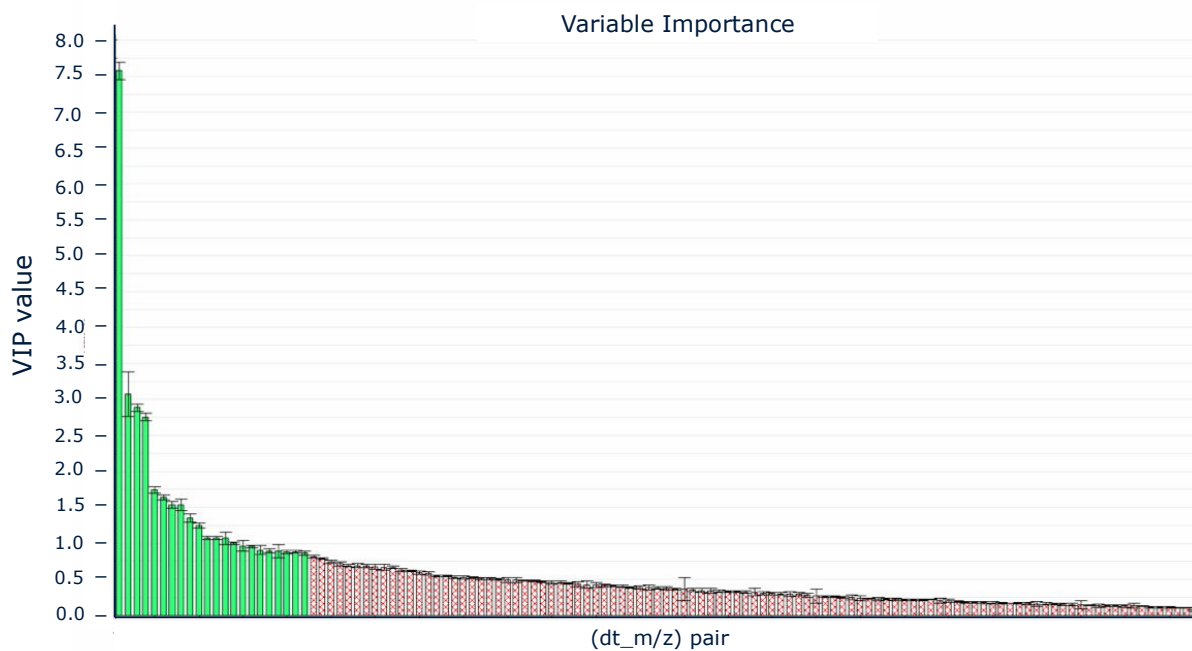

**Fig. S7** “A $\beta$ 40” sample set at 20  $\mu$ M. Representative EZinfo VIP plot ranking the *dt\_m/z marker pairs* of the “A $\beta$ 40” sample-class (shared by the “A $\beta$ 40” and “A $\beta$ 40 plus Porph” sample-classes or unique of the “A $\beta$ 40” class) selected on the S-plot of OPLSA-DA model according the acceptance criteria illustrated on Fig. S7. The bars correspond to the selected features. The height of each bar represents the VIP value as result of the overall contribution of each variable to the model taking into account both  $p(\text{corr})[1]$  (variable reliability) and  $p[1]$  (variable magnitude) values. Highlighted in green are *dt\_m/z marker pairs* with a VIP value higher than one with highest reliability and discriminatory capacity with  $\text{VIP} > 1.0$ . Some of them correspond to alkali metal adduct commonly observed in ESI-MS

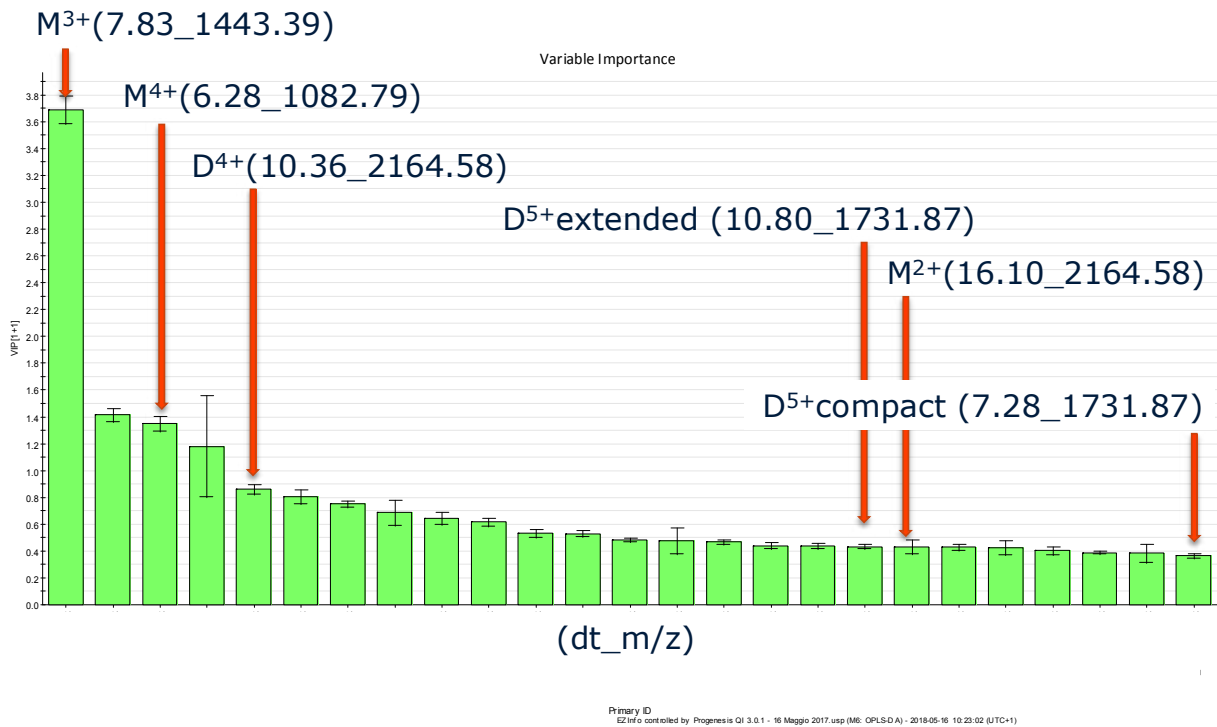

**Fig. S8** A $\beta$ 40'' sample-class at 20  $\mu$ M: representative EZInfo VIP plot. Zoom of the first region of the VIP plot on Fig. S8 including the most significant *dt\_m/z* marker pairs (VIP>1) finally selected to evaluate the inhibitory effect of Zn-Porph on their formation. For clarity, highlighted by arrows are the *rt\_m/z* pairs corresponding to the monomeric (M) and dimeric (D) species of A $\beta$ 40: M<sup>3+</sup>(7.83\_1443.39), M<sup>4+</sup>(6.28\_1082.79), D<sup>4+</sup>(10.36\_2164.58), extended (10.80\_1731.87) and compact (7.28\_1731.87) conformations of the D<sup>5+</sup>. The feature (16.10\_2164.58) corresponding to the M<sup>2+</sup> was selected only in the two sample-sets at 20  $\mu$ M. The bars not labelled correspond to alkali metal adduct commonly observed in ESI-MS



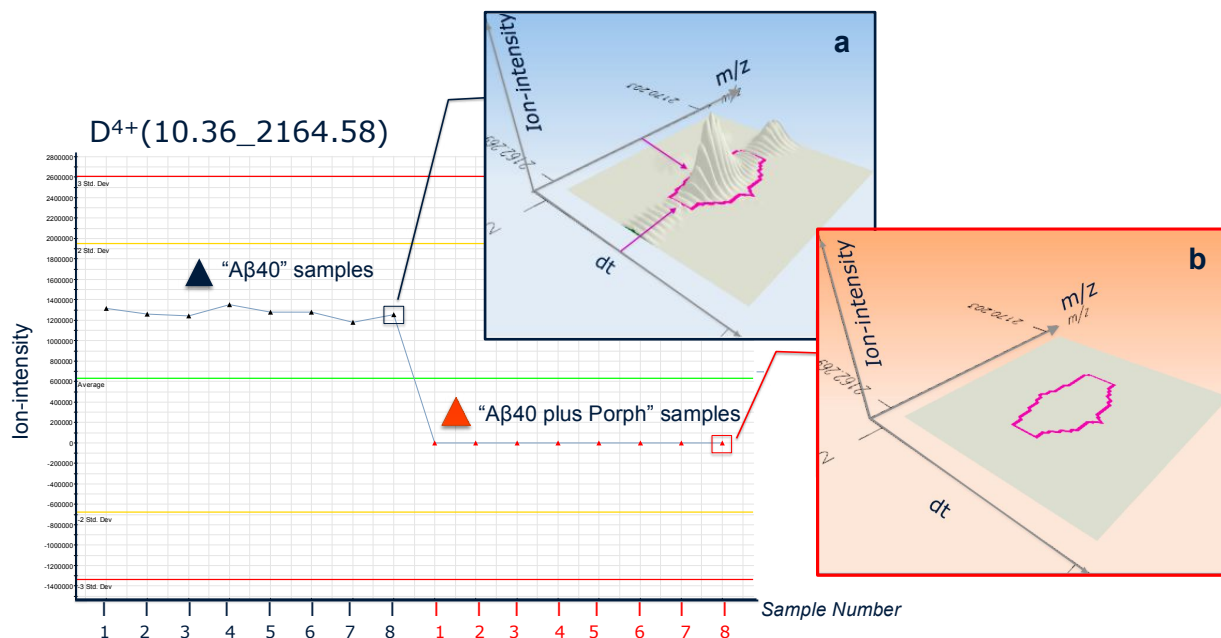

**Fig. S9** Representative ion intensity trend plot (XVar trend plot) of the feature corresponding to the  $D^{4+}(10.36\_2164.58)$  pair in the sample set incubated at  $37^{\circ}\text{C}$  for 2h before injection. On the y-axis is the ion-intensity value measured across the eight samples of the “A $\beta$ 40” sample-class (black dots) and the eight samples of the “A $\beta$ 40 plus Porph” class (red dots). Number of the sample in the two classes is shown on the x-axis. Ion-intensity values were measured by Progenesis QI software once alignment procedure and the automatic peak picking were performed (Fig.S6). The insets show the zoomed peak picking for the  $D^{4+}(10.36\_2164.58)$  pair of an “A $\beta$ 40” sample (a) and of an “A $\beta$ 40 plus Porph” sample (b) based on the measured isotopic envelope and drift time (dt) measurements

| A $\beta$ 40 species        | Primary ID    | p[1]   | p(corr)[1] | Average ion intensity "A $\beta$ 40" class | Std.Dev ion intensity "A $\beta$ 40" class | Average ion intensity "A $\beta$ 40 plus Porph" class | Std.Dev ion intensity "A $\beta$ 40 plus Porph" class |
|-----------------------------|---------------|--------|------------|--------------------------------------------|--------------------------------------------|-------------------------------------------------------|-------------------------------------------------------|
| M <sup>3+</sup>             | 7.83_1443.39  | 0.8874 | 0.9714     | 4.54e+06                                   | 2.18e+05                                   | 1.97e+06                                              | 4.23e+05                                              |
| M <sup>4+</sup>             | 6.28_1082.79  | 0.4301 | 0.9939     | 8.44e+05                                   | 3.98e+04                                   | 2.54e+05                                              | 3.73e+04                                              |
| D <sup>4+</sup>             | 10.36_2164.58 | 0.1039 | 0.9598     | 3.55e+04                                   | 8.68e+03                                   | 0                                                     | N/A                                                   |
| D <sup>5+</sup><br>extended | 10.80_1731.87 | 0.0948 | 0.9655     | 3.44e+04                                   | 6.58e+03                                   | 5.05e+03                                              | 4.63e+02                                              |
| D <sup>5+</sup><br>compact  | 7.28_1731.87  | 0.0729 | 0.9840     | 1.71e+05                                   | 2.75e+03                                   | 0                                                     | N/A                                                   |
| M <sup>2+</sup>             | 16.10_2164.58 | 0.0501 | 0.7988     | 3.10e+04                                   | 3.51e+04                                   | 2.10e+04                                              | 4.16e+03                                              |

**Table S4** Average ion-intensity and standard deviation value of *dt<sub>m/z</sub> marker pairs* used to evaluate the inhibitory effect of Zn-Porph (A $\beta$ 40:Zn-Porph, 1:1) on their formation in the sample-sets at 5  $\mu$ M. The *dt<sub>m/z</sub> marker pairs* are listed in descending order of their the covariance parameter p[1] value measuring their contribution to the inter-class separation. Due to its high intra-class intensity variability (p(corr)[1] < + 0.9), the *dt<sub>m/z</sub> pair* (16.10\_2164.58) corresponding to the A $\beta$ 40 M<sup>2+</sup> was automatically excluded from the data matrix of the sample-set at 5  $\mu$ M

| A $\beta$ 40 species     | Primary ID    | p[1]   | p(corr)[1] | Average ion intensity "A $\beta$ 40" class | Std.Dev ion intensity "A $\beta$ 40" class | Average ion intensity "A $\beta$ 40 plus Porph" class | Std.Dev ion intensity "A $\beta$ 40 plus Porph" class |
|--------------------------|---------------|--------|------------|--------------------------------------------|--------------------------------------------|-------------------------------------------------------|-------------------------------------------------------|
| M <sup>3+</sup>          | 7.83_1443.39  | 0.9206 | 0.9972     | 6.71e+06                                   | 3.42e+05                                   | 4.87e+05                                              | 9.36e+04                                              |
| M <sup>4+</sup>          | 6.28_1082.79  | 0.3523 | 0.9978     | 9.74e+05                                   | 3.84e+04                                   | 6.24e+04                                              | 2.30e+04                                              |
| D <sup>4+</sup>          | 10.36_2164.58 | 0.1265 | 0.9923     | 1.18e+05                                   | 1.14e+04                                   | 0                                                     | N/A                                                   |
| D <sup>5+</sup> extended | 10.80_1731.87 | 0.0740 | 0.9714     | 5.40e+04                                   | 7.39e+03                                   | 1.28e+04                                              | 1.47e+03                                              |
| M <sup>2+</sup>          | 16.10_2164.58 | 0.0634 | 0.9436     | 5.05e+04                                   | 4.66e+03                                   | 1.92e+04                                              | 6.81e+03                                              |
| D <sup>5+</sup> compact  | 7.28_1731.87  | 0.0540 | 0.9955     | 2.15e+04                                   | 1.60e+03                                   | 0                                                     | N/A                                                   |

**Table S5** Average ion-intensity and standard deviation value of *dt* *m/z* marker pairs used to evaluate the inhibitory effect of Zn-Porph (A $\beta$ 40:Zn-Porph, 1:1) on their formation in the sample set at 20  $\mu$ M. The *dt* *m/z* marker pairs are listed in descending order of their the covariance parameter p[1] value measuring their contribution to the inter-class separation

| A $\beta$ 40 species     | Primary ID    | p[1]   | p(corr)[1] | Average ion intensity "A $\beta$ 40" class | Std.Dev ion intensity "A $\beta$ 40" class | Average ion intensity "A $\beta$ 40 plus Porph" class | Std.Dev ion intensity "A $\beta$ 40 plus Porph" class |
|--------------------------|---------------|--------|------------|--------------------------------------------|--------------------------------------------|-------------------------------------------------------|-------------------------------------------------------|
| M <sup>3+</sup>          | 7.83_1443.39  | 0.9037 | 0.9982     | 2.75e+07                                   | 4.60e+05                                   | 2.92e+06                                              | 1.14e+06                                              |
| M <sup>4+</sup>          | 6.28_1082.79  | 0.3278 | 0.9990     | 3.50e+06                                   | 4.15e+04                                   | 2.74e+05                                              | 1.06e+05                                              |
| D <sup>4+</sup>          | 10.36_2164.58 | 0.2057 | 0.9991     | 1.27e+06                                   | 5.13e+04                                   | 0                                                     | N/A                                                   |
| M <sup>2+</sup>          | 16.10_2164.58 | 0.1166 | 0.9598     | 6.55e+05                                   | 2.65e+04                                   | 2.30e+05                                              | 9.05e+04                                              |
| D <sup>5+</sup> extended | 10.80_1731.87 | 0.1108 | 0.9987     | 4.83e+05                                   | 1.45e+04                                   | 1.14e+05                                              | 8.01e+03                                              |
| D <sup>5+</sup> compact  | 7.28_1731.87  | 0.0878 | 0.9991     | 2.31e+05                                   | 1.01e+04                                   | 0                                                     | N/A                                                   |

**Table S6** Average ion-intensity and standard deviation value of *dt<sub>m/z</sub> marker pairs* used to evaluate the inhibitory effect of Zn-Porph (A $\beta$ 40:Zn-Porph, 1:1) on their formation in the sample-sets at 20  $\mu$ M incubated at 37°C for 2h before injection. The *dt<sub>m/z</sub> marker pairs* are listed in descending order of their the covariance parameter p[1] value measuring their contribution to the inter-class separation
